# Supplementary material
Source: PubMed Central journal article supplement (PMC3050645)
Supplement: NIHMS193020-supplement-1_si_001.pdf [file NIHMS193020-supplement-1_si_001.pdf]

## How active site protonation state influences the reactivity and ligation of the heme in chlorite dismutase

Bennett R. Streit,<sup>1</sup> Béatrice Blanc,<sup>1</sup> Gudrun S. Lukat-Rodgers,<sup>2</sup> Kenton R. Rodgers,<sup>2</sup> Jennifer L. DuBois<sup>1</sup>

### Contents:

1. Change in absorbance spectrum observed following pH-jump from 6.8 to 4 (Figure S1)
2. Correlation between the change in absorbance of Soret band at 393 nm and rate of chlorite dismutation upon change of pH from 6.8 to 4 (Figure S2)
3. Titration of Cld heme chromophore over middle pH range (7– 11) (Figure S3)
4. High frequency rR spectra of ferrous Cld at pH 5.8, 6.8, 7.5, and 10.0 (Figure S4)
5. Resonance Raman spectra of the isotopomers of Cld-CO at pH 5.8, 6.8, and 10 (Figure S5)
6. UV/vis spectra of ligand-bound forms of Cld (Figure S6)
7. rR spectra of ligand-bound forms of Cld (Figure S7)
8. Representative titration plots for determination of Cld/ligand  $K_D$  values (Figure S8)
9. Table of Frequencies for Ferrous CO complexes of heme proteins (Table S1); data were used to generate correlation plot shown in text.
10. Table of UV/Visible bands and spin states for several heme proteins and their hydroxide complexes (Table S2)
11. Derivation of pH-rate equations used in text

Figure S1. Change in UV/visible absorbance upon changing pH from 6.8 (dashed line) to 4 (solid black line). Scans were taken at 3 s intervals after changing the pH from 6.8 to 4 by addition of a concentrated 100 mM citrate phosphate buffer, pH 3.2. All spectra were corrected for dilutions. The inset shows the absorbance at 393 as a function of time.

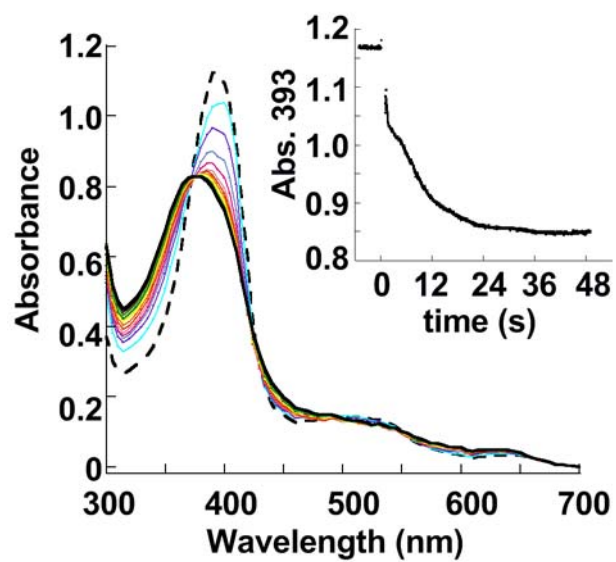

Figure S2. Correlation between the change in absorbance of Soret band at 393 nm and rate of chlorite dismutation upon change of pH from 6.8 to 4. To normalize the change in  $\Delta$ Absorbance or change in  $[O_2]$  concentration, the  $\Delta$ Abs at time  $t$  ( $\Delta$ Abs $_t$ ) or the  $[O_2]$  at time  $t$  ( $[O_2]_t$ ) is divided by either the  $\Delta$ Absorbance or  $[O_2]$  at the final time point ( $\Delta$ Abs $_f$  or  $[O_2]_f$ ). The time course of the  $O_2$ -evolution reaction, which does not go to completion, matches that of the Soret band's blue shift. This suggests that the reaction continues only as long as active enzyme is available.

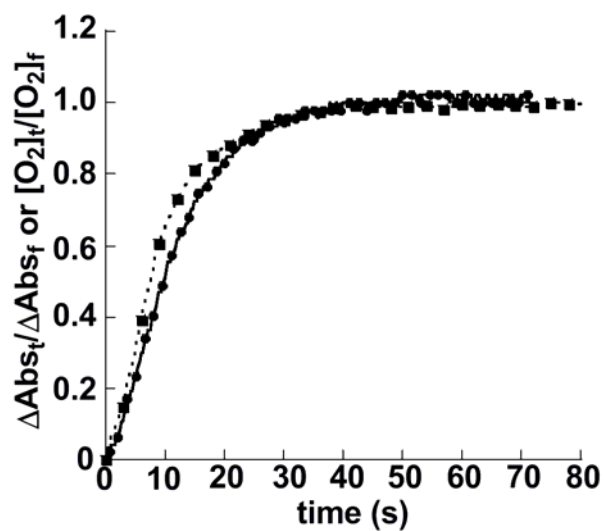

Figure S3.

(a) The Cld UV/vis spectrum was titrated from 6.7 (dashed line) to 9.5 (solid black line) at 25°C in 100 mM citrate-phosphate buffer. This buffer was used for all of the steady-state kinetic data reported in the text. The inset shows the absorbance at 393 as a function of pH with a  $pK_a$  of  $8.9 \pm 0.2$ . The peak maxima isosbestic points, and  $pK_a$  are all identical to what was measured in the 20mM (each) Mes/Ches/Tris mixed buffer reported in the text. Spectra were obtained at pH 6.7 (Soret band at 393 nm), 7, 7.5, 7.9, 8.2, 8.6, 9 and 9.5 (Soret band at 410 nm). As the pH increases above 9.5, the Soret absorbance begins to blue shift due to formation of a new 5cHS species presumed to be due to loss of axial His ligation and coordination of OH at the distal side. The spectrum at pH 6.7 shows a Soret band at 393 nm and CT bands at 644 nm and 509 nm respectively. At pH 9.5, the spectrum shows a Soret band at 410 nm, and  $\alpha$  and  $\beta$  at 576 nm and 533 nm respectively. The isosbestic points for the transition of the 5c-HS species to the 6c species occur at approximately 351 nm, 469 nm, 540 nm, 558 nm, 621 nm. Discrepancies in the isosbestic points are likely due to small shifts in the UV/vis baseline that occurred following removal and refilling of the spectrometer cuvette.

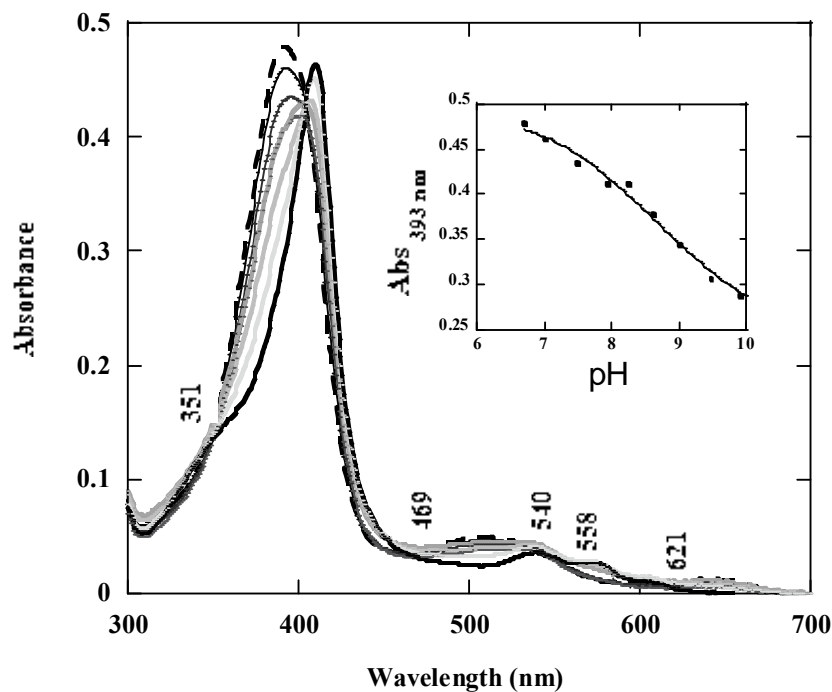

Figure S4. High frequency rR spectra of ferrous Cl<sub>d</sub> at pH 5.8, 6.8, 7.5, and 10.0. Spectra were acquired with 406.7 nm excitation (18 mW). Solutions at pH 6.8 and 7.5 were buffered in 100 mM sodium phosphate. The pH 5.8 and 10.0 solutions were buffered with 100 mM sodium citrate and Ches, respectively. The asterisks mark intensity due to Hg atomic emission from inadvertent and indirect exposure of the spectrometer to ambient fluorescent lighting.

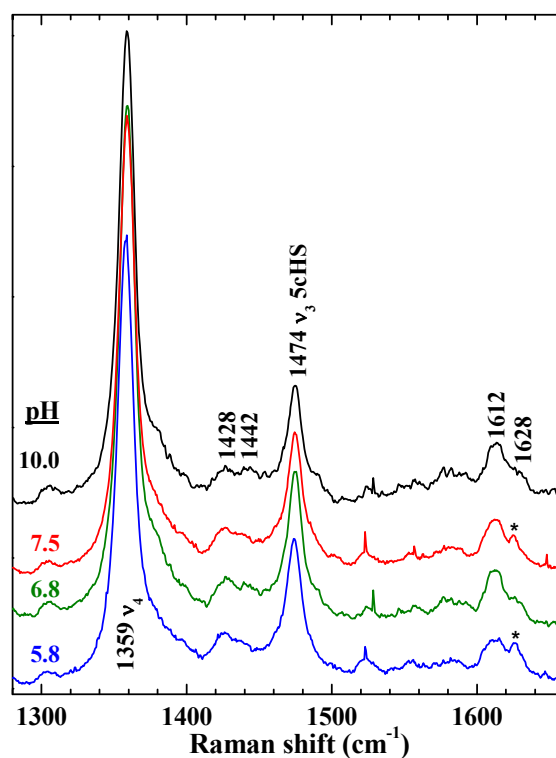

Figure S5. Soret-excited (413.1 nm) rR spectra of Cld-CO (black) and Cld-<sup>13</sup>CO (red), along with the respective difference spectra (blue) as a function of pH. The difference spectra reveal the isotope-sensitivities of the  $\nu_{\text{Fe-C}}$  and  $\nu_{\text{C-O}}$  bands. They further reveal two forms of Cld-CO whose relative populations are sensitive to pH. The FeCO features attributable to form 1 have greater amplitude than those of form 2. However form 1 is more favored at high pH than it is at low pH. Bands arising from FeCO vibrations are labeled in blue and were assigned based on their <sup>13</sup>CO isotope shifts. Iron porphyrinate bands are labeled in green.

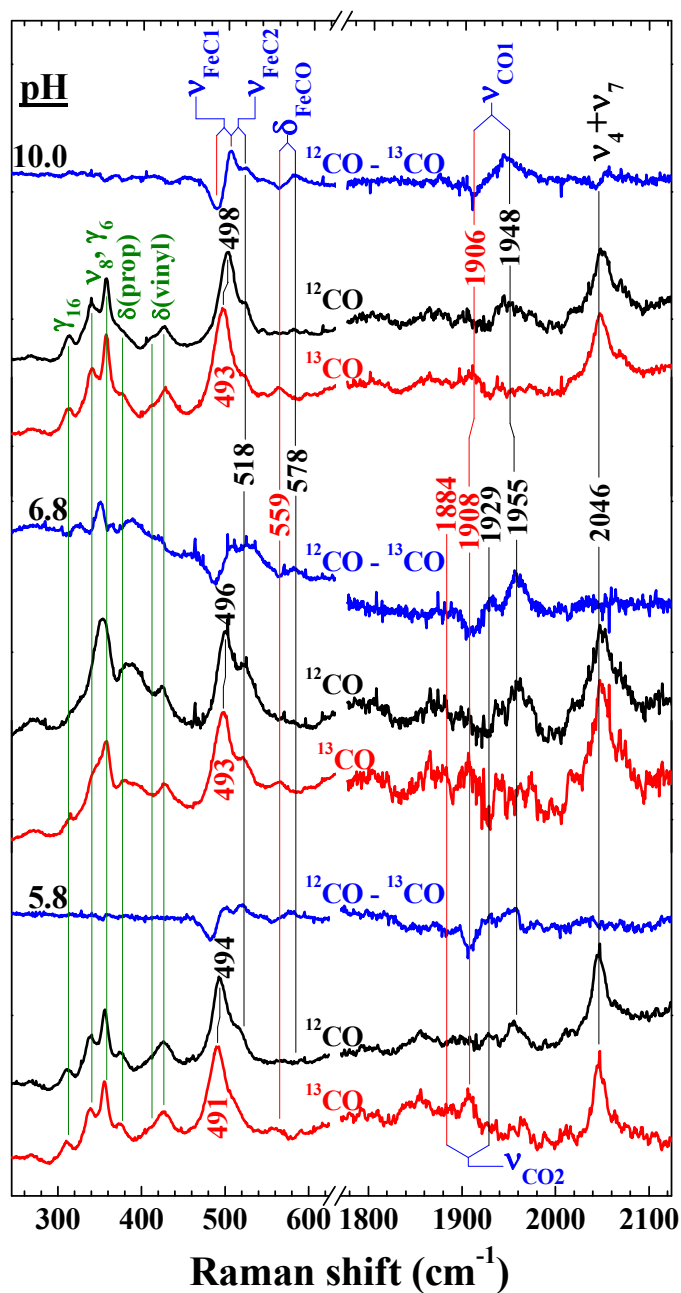

Figure S6. Spectra of ligand-bound Cld. Spectra were measured at ligand concentrations and pH values ensuring full occupation of the Fe sites. The visible region of the spectrum (450 -800 nm) is magnified 10 fold for clarity. (a) oxidized Cld; (b) cyanide bound spectrum; (c) azide bound spectrum; (d) fluoride bound spectrum; (e) nitrite bound spectrum; (f) pyridine bound spectrum; (g) thiocyanate bound spectrum; (h) imidazole bound spectrum. Peak positions are indicated on Table 2 in the text.

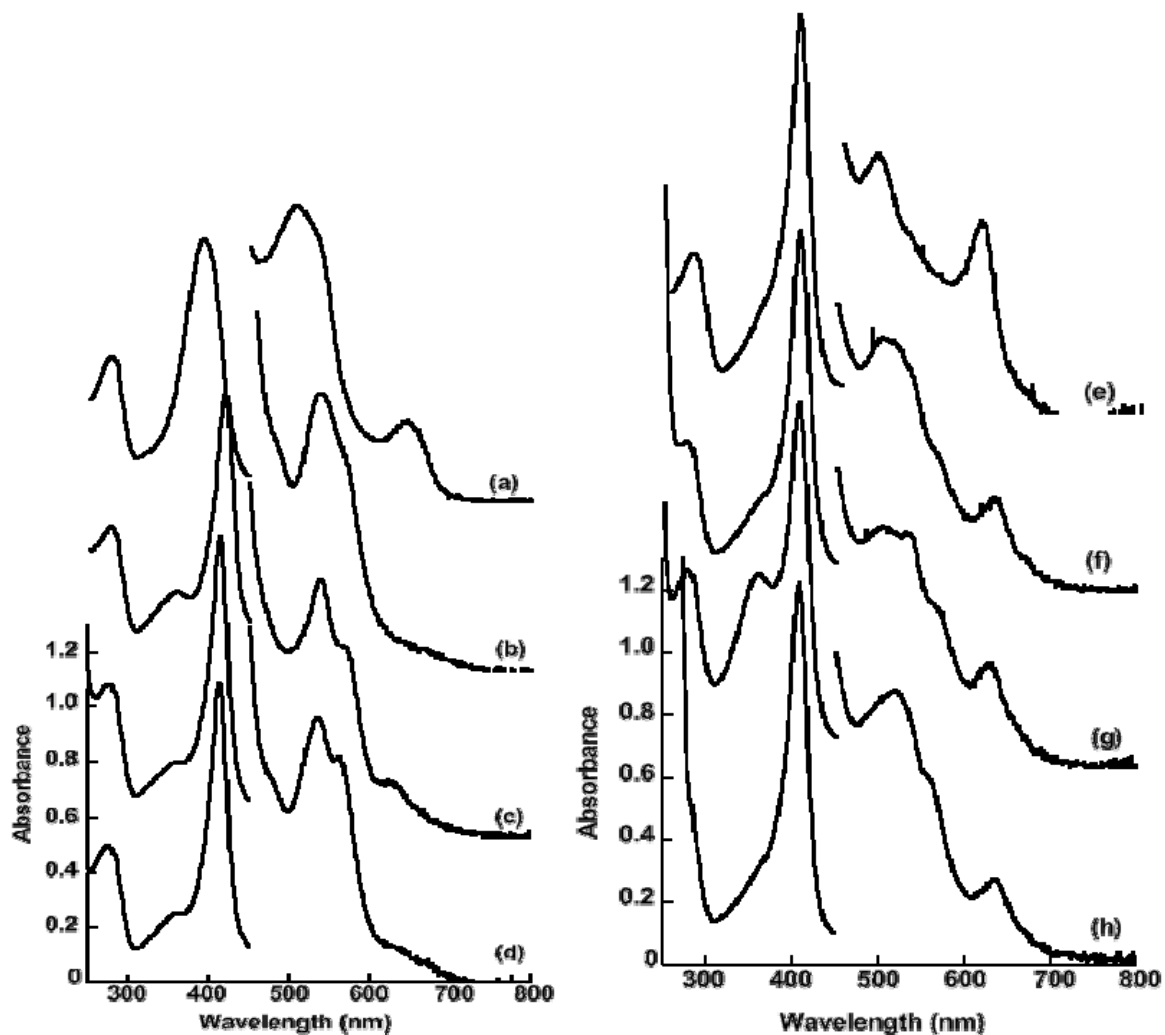

Figure S7. Soret-excited rR spectra of ferric Cld complexes: Cld-CN<sup>-</sup> (4.5 mM NaCN, pH 7.0), Cld-ImH (1.2 mM imidazole, pH 7.5), Cld-N<sub>3</sub><sup>-</sup> (2.0 mM NaN<sub>3</sub>, pH 7.5), Cld-NO<sub>2</sub><sup>-</sup> (11 mM NaNO<sub>2</sub>, pH 6.8), Cld-SCN<sup>-</sup> (9.8 mM KSCN, pH 5.8), and Cld-F<sup>-</sup> (1.3 M NaF, pH 5.8). These complexes were prepared at the pH of their greatest thermodynamic stability in the presence of saturating exogenous ligand concentrations, as determined by spectrophotometric titrations (see Figure 7). The Cld-CN<sup>-</sup> and Cld-ImH complexes are completely 6c and LS. The Cld-N<sub>3</sub><sup>-</sup>, Cld-NO<sub>2</sub><sup>-</sup>, and Cld-SCN<sup>-</sup> complexes harbor equilibrium mixtures of 6cHS and 6cLS hemes. The Cld-F<sup>-</sup> complex is 6cHS.

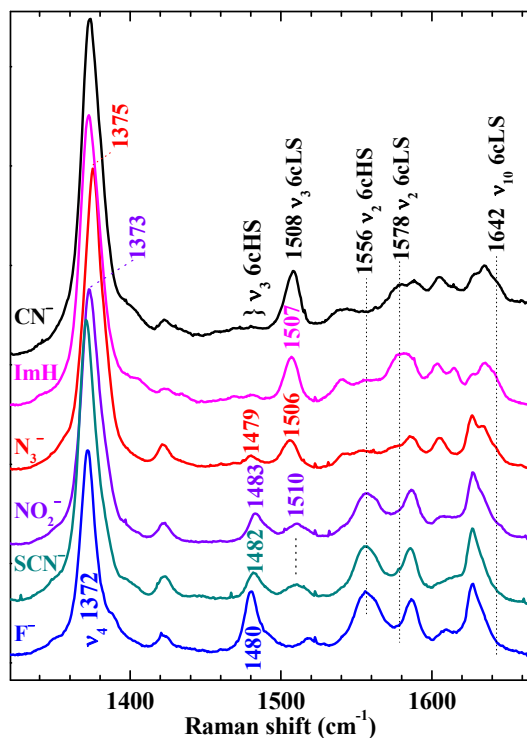



Figure S8. Representative plots illustrating data quality and analysis for Cld/ligand binding titrations. (a) Titration of imidazole at pH 7.0 in a 10 mM phosphate buffer. Spectra were measured after imidazole additions of 0, 4.84, 9.38, 13.7, 17.6, 21.4, 25.0, 28.4, 47.4, 65.4, 82.5, 446, and 793  $\mu\text{M}$ . Spectra are corrected for dilution. The inset shows an expanded view of the visible region of the spectrum. (b) Difference plot generated from (a). (c) Plot of  $\Delta\text{Abs}_{385}$  as a function of ligand concentration. The inset shows an expanded view of the initial changes in absorbance as a function of pH. The data were fit to an equilibrium isotherm, as described in the text.

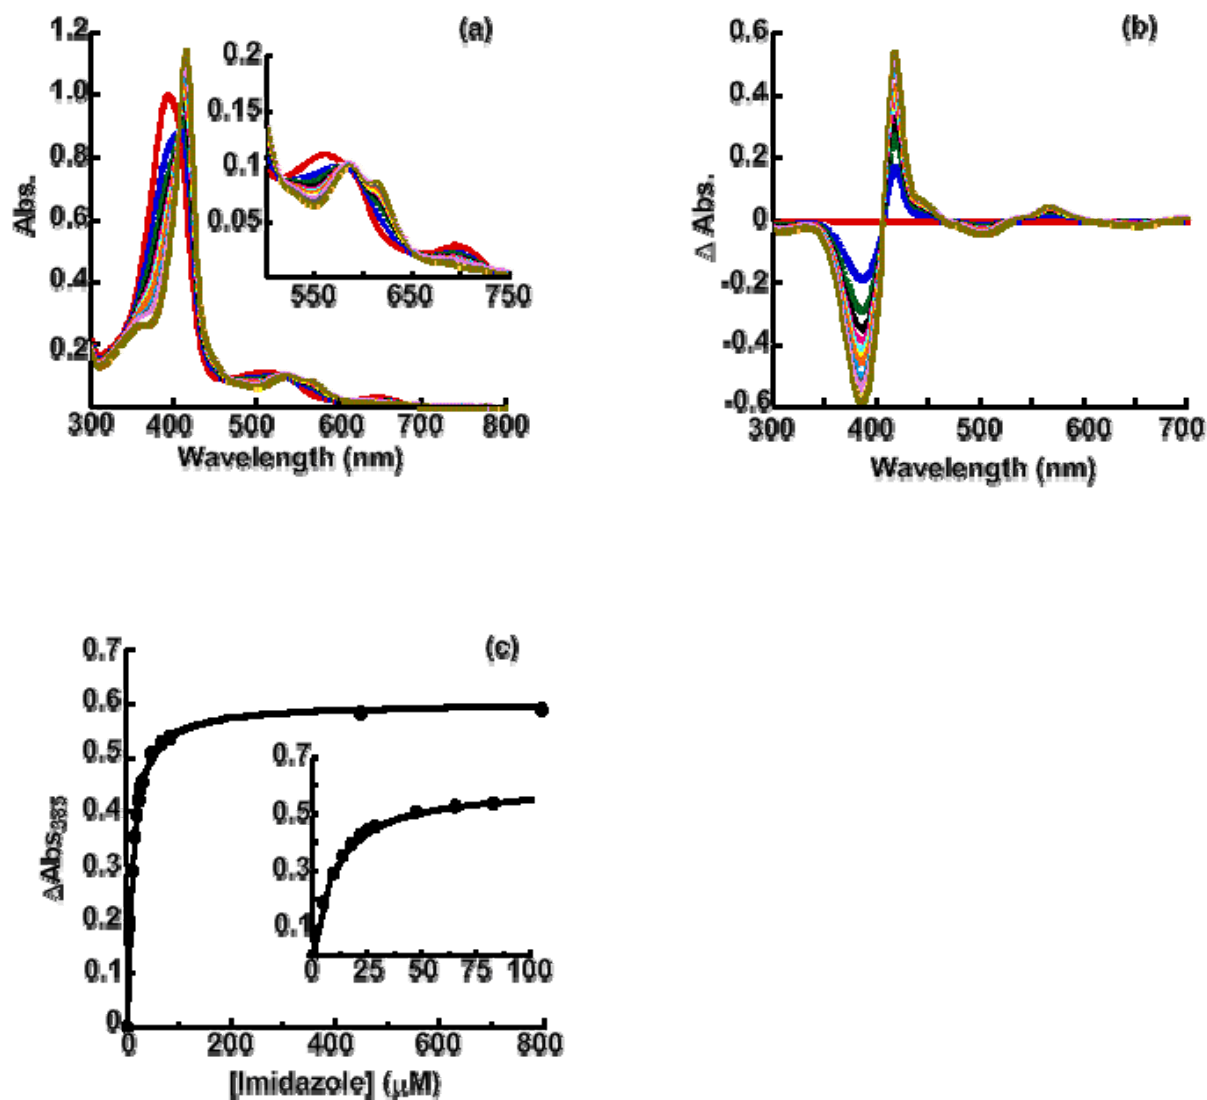

Table S1. Frequencies for Ferrous CO complexes of heme proteins

| Fe(II)-CO               | $\nu\text{Fe-C}$ | $\nu\text{C-O}$ | $\delta\text{Fe-C-O}$ | Reference |
|-------------------------|------------------|-----------------|-----------------------|-----------|
| Cld pH 6.8              | 496              | 1957            | 575                   | this work |
| Cld pH 10.0             | 499              | 1945            | 576                   | this work |
| Sensor Proteins         |                  |                 |                       |           |
| sGC                     | 472              | 1987            | 562                   | 1         |
| <i>Ec</i> Dos           | 486              | 1973            | nr                    | 2         |
| <i>Ec</i> DosH          | 487              | 1969            | 575                   | 3         |
| CooA                    | 487              | 1982            | nr                    | 4         |
| <i>Ax</i> PDEA1H        | 493              | 1973            | 581                   | 3         |
| HemAT-B                 | 494              | 1964            | 573                   | 5         |
| <i>Mt</i> DosH          | 494              | 1972            | 570                   | 3         |
| NPAS2 bHLH-PAS-A        | 495              | 1962            | nr                    | 6         |
| NPAS2 PAS-A             | 496              | 1962            | 572                   | 7         |
| <i>Bj</i> FixL          | 496              | 1969            | 571                   | 3         |
| sGC                     | 497              | 1959            | 574                   | 8, 9      |
| NPAS2 PAS-B             | 497              | 1962            | 577                   | 10        |
| CLOCK PAS-A             | 498              | 1960            | 576                   | submitted |
| <i>Rm</i> FixLH         | 498              | 1962            | 576                   | 11        |
| CooA(alkaline)          | 500              | 1964            | nr                    | 4         |
| <i>Rm</i> FixLT         | 502              | 1956            | 572                   | 11        |
| Peroxidases/catalases   |                  |                 |                       |           |
| HRP(I)                  | 490              | 1932            |                       | 12        |
| CCP(I)                  | 495              | 1922            |                       | 13        |
| KatG                    | 499              | 1965            | no                    | 14        |
| HRP(III)                | 516              | 1933            |                       | 15, 16    |
| KatG                    | 522              | 1926            | 584                   | 14        |
| CCP(II)                 | 530              | 1922            |                       | 13        |
| HRP(II)                 | 539              | 1906            |                       | 12,16,15  |
| Catalase                | 542              | 1908            |                       | 17        |
| Heme Transport proteins |                  |                 |                       |           |

|                            |     |      |     |                     |
|----------------------------|-----|------|-----|---------------------|
| PhuS                       | 498 | 1960 | 578 | 18                  |
| ShuS                       | 498 | 1964 | 582 | unpublished results |
| <i>SmHasA</i>              | 532 | 1954 |     | 19                  |
| Globins                    |     |      |     |                     |
| SW myoglobin               | 507 | 1947 |     | 20, 21              |
| human myoglobin            | 508 | 1941 |     | 22, 23              |
| <i>M. tuberculosis</i> HbN | 500 | 1948 |     | 24                  |
|                            | 534 | 1917 |     | 24                  |
| <i>Ascaris suum</i> Hb     | 543 | 1909 | 588 | 25                  |
|                            | 515 | 1948 |     | 25                  |
| Models                     |     |      |     |                     |
| PPDMe(Im <sup>7</sup> )    | 490 | 1942 |     | 12                  |
| PPMeImH                    | 495 | 1960 |     | 12                  |

Table S2. UV/Visible bands and spin states for several heme proteins and their hydroxide complexes

| Protein              | Sixth ligand       | Soret       | CT1   | $\beta$ | $\alpha$ | CT2       | Spin     | Ref   |
|----------------------|--------------------|-------------|-------|---------|----------|-----------|----------|-------|
| HRP (pH <3.1)        | H <sub>2</sub> O*  | 370         | -     | 515     | -        | 652       | hs       | 26    |
| HRP( neutral)        | none               | 403         | 497   | -       | -        | 641       | hs       | 27    |
| HRP (pH 11)          | OH <sup>-</sup>    | 416         | -     | 545     | 575      | -         | ls       | 27    |
| CCp (neutral)        | none               | 408         | 508   | 540     | 592      | 644       | hs       | 28    |
| CCp (pH 8)           | His                | 414         | 488   | 534     | 563      | 629       | ls       | 28    |
| HRP(H42R)            | OH <sup>-</sup>    | 408         | 498   | 538     | 575      | 607 (643) | mixed    | 29    |
| CCp(D235N)           | none               | 406         | 500   | 535     | 576      | 624       | hs       | 28    |
| CCp(D235N)           | OH <sup>-</sup>    | 412         | 503   | 541     | 576      | 627       | ls       | 28    |
| CCp(D235N)           | His                | 414         | 485   | 531     | 566      | 634       | ls       | 28    |
| swMb (pH 4)          | H <sub>2</sub> O * | 370         |       | 510     |          | 641       | hs       | 26    |
| swMb (neutral)       | H <sub>2</sub> O   | 409.5       | 505   | 546     | 590      | 635       | hs       | 30,31 |
| swMb (pH < 11)       | OH <sup>-</sup>    | 414         | 484   | 542     | 582      | 595       | mixed    | 30,31 |
| CIP (pH 3.8)         | H <sub>2</sub> O*  | 394         | -     | 507     |          | 652       | hs       | 26    |
| CIP (neutral)        | none               | 403         | -     | 505     | 534      | 649       | hs       | 26    |
| CIP (pH 12.1)        | OH <sup>-</sup>    | 412 (370sh) | -     | 543     | 575      | -         | ls       | 26    |
| CIP(D245N) (pH3.8)   | H <sub>2</sub> O   | 412 (370)   | 506   | 534     | 575      | 639       | hs (hs*) | 26    |
| CIP(D235N) (neutral) | H <sub>2</sub> O   | 407         | 502   | 536     | 575      | 639       | hs       | 26    |
| CIP(245N) (pH 10)    | OH <sup>-</sup>    | 410 (370)   | (511) | 541     | 575      | (644)     | hs (hs*) | 26    |

<sup>a</sup> Phosphate buffer; <sup>b</sup> nitrate buffer; \* coordination of water or hydroxide, but loss of proximal His ligation.

### Sample equation derivation

A derivation of the equation describing the pH dependence of  $k_{cat}/K_m$  exhibiting 3  $pK_a$ s (model 1, equation (7) in text) is shown:

A 3  $pK_a$  model implies that there are at least four different enzyme forms separated by the 3 turning points on the  $k_{cat}/K_m$  plot:

$$k_{cat}/K_m (\text{obs}) = c[\text{EH}_2]/[\text{E}_T] + c'[\text{EH}]/[\text{E}_T] \quad (\text{Eq.S1})$$

In the present case, the enzyme forms  $\text{EH}_2$  and  $\text{EH}$  are active.  $\text{EH}_3$  and  $\text{E}$  are not active. Therefore, at any pH, the observed  $k_{cat}/K_m$  is a function of the proportion of enzyme in the  $\text{EH}_2$  form and its intrinsic  $k_{cat}/K_m$  (called  $c$ ) and the  $\text{EH}$  form and its intrinsic  $k_{cat}/K_m$  ( $c'$ ). :

$$k_{cat}/K_m (\text{obs}) = c[\text{EH}_2]/[\text{E}_T] + c'[\text{EH}]/[\text{E}_T] \quad (\text{Eq.S2})$$

With three  $pK_a$ s, the total enzyme concentration  $\text{E}_T$  will be partitioned according to the pH of the solution:

$$\text{E}_T = \text{EH}_3 + \text{EH}_2 + \text{EH} + \text{E} \quad (\text{Eq.S3})$$

Partitioning of the enzyme between the 4 forms will be determined by the three  $K_a$ s according to:

$$\mathbf{Ka(1)} = \frac{[\text{EH}_2][\text{H}^+]}{[\text{EH}_3]}, \mathbf{Ka(2)} = \frac{[\text{EH}][\text{H}^+]}{[\text{EH}_2]}, \mathbf{Ka(3)} = \frac{[\text{E}][\text{H}^+]}{[\text{EH}]} \quad (\text{Eq. S4 - S6})$$

These  $K_a$  expressions are rearranged and used to express  $[\text{E}_T]$  in terms of the concentration of each enzyme species in the numerator terms of Eq.S2. For example:

$$[\text{EH}_3] = [\text{EH}_2][\text{H}^+]/K_a(1)$$

$$[\text{EH}] = K_a(2) [\text{EH}_2]/[\text{H}^+]$$

$$[\text{E}] = K_a(3)[\text{EH}]/[\text{H}^+] = K_a(2) \times K_a(3) [\text{EH}_2]/[\text{H}^+]^2$$

$$\text{And } [\text{E}_T] = [\text{EH}_2][\text{H}^+]/K_a(1) + [\text{EH}_2] + K_a(2) [\text{EH}_2]/[\text{H}^+] + K_a(2) \times K_a(3) [\text{EH}_2]/[\text{H}^+]^2$$

A similar expression can be written in terms of  $[\text{EH}]$ . These expressions for  $[\text{E}_T]$  are substituted back into Eq.S2 to give the expression:

$$k_{cat}/K_m (\text{obs}) = \left\{ \frac{c}{1 + \frac{K_a(2) \times K_a(3)}{[\text{H}^+]^2} + \frac{[\text{H}^+]}{K_a(1)} + \frac{K_a(2)}{[\text{H}^+]}} + \frac{c'}{1 + \frac{[\text{H}^+]}{K_a(2)} + \frac{K_a(3)}{[\text{H}^+]} + \frac{[\text{H}^+]^2}{K_a(1) \times K_a(2)}} \right\}$$

Taking the logarithm of both sides gives equation (7). The other equations expressing the pH dependence of kinetic parameters or  $K_D$  were derived in an analogous way.

## References

- (1) Tomita, T.; Ogura, T.; Tsuyama, S.; Imai, Y.; Kitagawa, Y. *Biochemistry* **1997**, *36*, 10155-10160.
- (2) Sato, A.; Sasakura, Y.; Sugiyama, S.; Shimizu, T.; Mizutani, Y.; Kitagawa, T. *Journal of biological chemistry* **2002**, *277*, 32650-32658.
- (3) Tomita, T.; Gonzalez, G.; Chang, A.L.; Ikeda-Saito, M.; Gilles-Gonzales, M.A. *Biochemistry* **2002**, *41*, 4819-4826.
- (4) Coyle, C.M.; Puranik, M.; Youn, H.; Nielsen, S.B.; Williams, R.D.; Kerby, R.L.; Roberts, G.P.; Spiro, T.G. *Journal of biological chemistry* **2003**, *278*, 35384-35393.
- (5) Aono S., Kato, T., Matsuki, M., Nakajima, H. Ohta, T., Uchida, T., Kitagawa, T. **2002** *Journal of biological chemistry*, *277*, 13528-13538.
- (6) Mukaiyama, Y.; Uchida, T.; Sato, E.; Sasaki, A.; Sato, Y.; Igarashi, J.; Kurokawa, H.; Sagami, I.; Kitagawa, T.; Shimizu, T. *FEBS journal* **2006**, *273*, 2528-2539.
- (7) Uchida, T.; Sato, E.; Sato, A.; Sagami, I.; Shimizu, T.; Kitagawa, T. *Journal of biological chemistry* **2005**, *280*, 21358-21368.
- (8) Yu A.E.; Hu, S.; Spiro, T.G.; Burstyn, J.N. *Journal of the American Chemical Society* **1994**, *116*, 4117-4418.
- (9) Fan, B.; Gupta, G.; Danziger, R.S.; Friedman, J.M.; Rousseau, D.L. *Biochemistry* **1998**, *37*, 1178-1184.
- (10) Koudo, R.; Kurokawa, H.; Sato, E.; Igarashi, J.; Uchida, T.; Sagami, I.; Kitagawa, T.; Shimizu, T. *FEBS journal* **2005**, *272*, 4153-4162.
- (11) Miyatake, H.; Mukai, M.; Adachi, S.I.; Nakamura, H.; Tamura, K.; Iizuka, T.; Shiro, Y.; Strange, R.W.; Hasnain, S.S. *Journal of biological chemistry* **1999**, *274*, 23176-23184.
- (12) Evangelista-kirkup, R.; Smulevich, G.; Siro, T.G. *Biochemistry* **1986**, *25*, 4420-4425.
- (13) Li, X. Y.; Spiro, T. G. *J. Am. Chem. Soc.* **1988**, *110*, 6024-6033.
- (14) Lukat-Rodgers, G.S.; Wengenack, N.L.; Rusnak, F.; Rodgers, K.R. *Biochemistry* **2001**, *40*, 7149-7157.
- (15) Uno, T.; Nishimura, Y.; Tsuboi, M.; Makino, R.; Iizuka, T.; Ishimura, Y. *Journal of biological chemistry* **1987**, *262*, 4549-4556.
- (16) Feis, A.; Rodriguez-Lopez, J.N.; Thorneley, R.N.F.; Smulevich, G. *Biochemistry* **1998**, *37*, 13575-13581.
- (17) Hu, S.; Kincaid, J.R. *FEBS letters* **1992**, *314*, 293-296.
- (18) Block, D.R.; Lukat-Rodgers, G.S.; Rodgers, K.R.; Wilks, A.; Bhata, M.N.; Lansky, I.B. *Biochemistry* **2007**, *46*, 14391-14402.
- (19) Lukat-Rodgers, G. S.; Rodgers, K. R.; Caillet-Saguy, C.; Izadi-Pruneyre, N.; Lecroisey, *Biochemistry* **2008**, *47*, 2087-2098.
- (20) Anderton, C.L.; Hester, R.E.; Moore, J.N. *Biochimica et Biophysica Acta* **1997**, *1338*, 107-120.
- (21) Spiro, T.G.; Wasbotten, I.H. *Journal of inorganic biochemistry* **2005**, *99*, 34-44.
- (22) Ling, J.; Li, T.; Oslon, J.S.; Bocian, D.F. *Biochimica et biophysica acta.* **1994**, *1188*, 417-421.

- (23) Li, T.; Quillin, M.L.; Phillips, G.N., Jr, Olson, J.S. *Biochemistry* **1994**, *33*, 1433-1446.
- (24) Yeh, S.R.; Couture, M.; Oullet, Y.;Guertin, M.; Rousseau, D.L. *Journal of biological chemistry* **2000**, *275*, 1679-1684.
- (25) Das, T.K.; Friedman, J.M.; Kloek, A.P.; Goldberg, D.E.; Rousseau, D.L. *Biochemistry* **2000**, *39*, 837-842.
- (26) Smulevich, G.; Neri, F.; Marzocchi, M. P.; Welinder, K. G. *Biochemistry* **1996**, *35*, 10576-10585.
- (27) Keilin, D.; Hartree, E. F. *Biochem. J.* **1951**, *49*, 88-106.
- (28) Vitello, L. B.; Erman, J. E.; Miller, M. A.; Mauro, J. M.; Kraut, J. *Biochemistry* **1992**, *31*, 11524-11535.
- (29) Howes, B. D.; RodriguezLopez, J. N.; Smith, A. T.; Smulevich, G. *Biochemistry* **1997**, *36*, 1532-1543.
- (30) Hanania, G. I.; Yeghiayan, A.; Cameron, B. F. *Biochem. J.* **1966**, *98*, 189-192.
- (31) Smith, D. W.; Williams, R. J. *Biochem. J.* **1968**, *110*, 297-301.
